# Supplementary material
Source: PubMed Central journal article supplement (PMC6511783)
Supplement: ajtr0011-2304-f7.pdf [file ajtr0011-2304-f7.pdf]

## Calcitriol and cultured human periodontium cells

**Supplementary Table 2.** Alkaline phosphatase activity assay

| Alkaline phosphatase activity | P<.05  | Mean ± standard error | Control   | Vitamin C | 10 nM calcitriol | 100 nM calcitriol |
|-------------------------------|--------|-----------------------|-----------|-----------|------------------|-------------------|
| Control                       | 2 week | 1.00± 0.00            |           | 0.532     | 0.002**          | 0.065             |
|                               | 3 week | 1.00±0.00             |           | 0.008**   | 0.002**          | 0.011*            |
| Vitamin C                     | 2 week | 0.013                 | 1.11±0.15 |           | 0.001**          | 691               |
|                               | 3 week |                       | 1.79±0.21 |           | 0.001**          | 875               |
| 10 nM calcitriol              | 2 week | 0.551                 | 3.32±0.41 |           |                  | 0.001**           |
|                               | 3 week |                       | 3.00±0.32 |           |                  | 0.221             |
| 100 nM calcitriol             | 2 week | 0.074                 | 1.28±0.22 |           |                  |                   |
|                               | 3 week |                       | 2.06±0.38 |           |                  |                   |

\* $p < 0.05$ , \*\* $p < 0.01$ .
